# Supplementary material for: Preserving inhibition with a disinhibitory microcircuit in the retina
Source: eLife. 2020 Dec 3;9:e62618. doi: 10.7554/eLife.62618 (PMC7728437; doi:10.7554/eLife.62618)
Supplement: Figure 1—figure supplement 1—source data 1. [file elife-62618-fig1-figsupp1-data1.xlsx]

## Sheet: Sup Figure 1a
Cell ID	Type ID (1 control; 2 gabra2)	Amplitude ( pA)	Per cell Avarage (pA)
1	1	543	324.6
1	1	190
1	1	363
1	1	326
1	1	201
2	1	270	203.5
2	1	224
2	1	232
2	1	217
2	1	140
2	1	138
3	1	158	254.4
3	1	246
3	1	322
3	1	232
3	1	314
4	1	290	251.8
4	1	178
4	1	161
4	1	229
4	1	401
5	1	279	348.111
5	1	303
5	1	531
5	1	365
5	1	211
5	1	421
5	1	506
5	1	239
5	1	278
6	1	231	228.75
6	1	269
6	1	163
6	1	252
7	2	266	206.333
7	2	173
7	2	197
7	2	237
7	2	190
7	2	175
8	2	204	215.667
8	2	231
8	2	212
9	2	145	492.767
9	2	2157
9	2	190
9	2	200.6
9	2	109
9	2	155
10	2	160	215.333
10	2	242
10	2	182
10	2	317
10	2	200
10	2	191
11	2	243	280.5
11	2	169
11	2	219
11	2	430
11	2	280
11	2	342
12	2	481	282.667
12	2	217
12	2	159
12	2	335
12	2	149
12	2	355
