# Supplementary material for: Preserving inhibition with a disinhibitory microcircuit in the retina
Source: eLife. 2020 Dec 3;9:e62618. doi: 10.7554/eLife.62618 (PMC7728437; doi:10.7554/eLife.62618)
Supplement: Figure 1—figure supplement 2—source data 1. [file elife-62618-fig1-figsupp2-data1.xlsx]

## Sheet: Sup Figure 2c
First spike latency (second)
Control			Gabra2
No noise	Noise		No noise	Noise
0.3974	0.5118		0.3047	0.5897
0.5263	0.6335		0.2874	0.3562
0.3037	0.3355		0.2004	0.4628
0.4126	0.5955		0.3919	0.4774
0.472	0.6828		0.3919	0.4832
0.4094	0.4955		0.6851	0.7459
0.3669	0.497		0.5694	0.6043
0.6548	0.7009		0.4959	0.6693
0.3802	0.594		0.6693	0.7996
0.6376	0.7858		0.4698	0.5396
0.4878	0.6407		0.6136	0.6718
0.4411	0.5895
0.4787	0.5344
0.4704	0.5801

## Sheet: Sup Figure 2d
before	DHbE
329.793	167.44
120.89	124.308
217.814	144.491
221.883	176.921
337.484	462.891
481.862	265.676
280.64	87.9211
448.085	255.534
623.25	422.119

## Sheet: Sup Figure 2e
before	DHbE
183.746	170.349
132.843	142.151
118.408	125.773
123.962	84.7321
367.706	349.609
252.914	201.202
91.3696	120.804
156.677	85.2167
286.187	218.206
