# Supplementary material for: Preserving inhibition with a disinhibitory microcircuit in the retina
Source: eLife. 2020 Dec 3;9:e62618. doi: 10.7554/eLife.62618 (PMC7728437; doi:10.7554/eLife.62618)
Supplement: Figure 1—figure supplement 3—source data 1. [file elife-62618-fig1-figsupp3-data1.xlsx]

## Sheet: Sup Figure 3a
EPSC amplitude Null		EPSC amplitude Pref
Control	Gabra2		Control	Gabra2
102.011	104.101		236.718	125.158
127.381	180.294		192.415	119.619
88.2536	174.864		95.0634	221.369
144.649	178.947		230.463	204.511
150.23	308.458		275.625	332.235
211.678	299.194		209.298	351.105
176.022	273.724		296.231	331.964
160.041	328.076		252.535	352.661
142.86	218.193		187.874	240.643
107.191	135.409		148.207	266.418
192.925			241.279
264.187			276.326
282.771			339.114
317.062			331.474
84.0988			164.085

## Sheet: Sup Figure 3b
EPSC amplitude Null		EPSC amplitude Pref
Control	Gabra2		Control	Gabra2
67.6952	75.9278		170.215	101.666
109.817	189.573		168.709	137.957
98.7638	211.472		151.17	286.917
143.849	213.212		192.06	230.014
90.973	149.143		175.082	136.393
121.469	147.606		146.722	168.32
76.5776	257.446		151.682	223.961
138.119	276.904		188.264	306.038
199.407	112.5		199.102	99.7847
95.988	146.112		130.249	163.24
254.096			206.502
212.741			233.71
254.326			208.041
186.971			158
164.139			150.619

## Sheet: Sup Figure 3c
EPSC Charge Transfer Null (pA*s)			EPSC Charge Transfer Pref
Control	Gabra2			Control	Gabra2
41.2818	39.9232			88.8691	32.8054
45.0097	20.63			56.6359	55.8611
22.8528	82.0722			26.799	72.4477
53.1487	65.1969			77.3299	59.252
51.2307	170.226			123.005	200.761
64.188	170.212			51.2439	151.299
82.9695	90.3068			104.591	160.207
66.4759	172.103			106.51	148.079
44.1544	84.3542			37.8433	91.1659
40.5368	72.6888			64.0903	116.361
64.2612				102.279
117.265				130.831
124.082				137.439
155.452				141.03
39.7559				51.3538

## Sheet: Sup Figure 3d
EPSC Charge Transfer Null (pA*s)				EPSC Charge Transfer Pref
Control	Gabra2			Control	Gabra2
25.9601	15.4761			46.1017	27.5635
31.2456	44.4903			37.3155	32.4522
23.2582	91.3239			36.1999	118.898
41.0834	72.194			59.4097	65.4422
13.5759	57.704			52.4992	63.0473
19.0445	14.7665			30.7737	64.6637
16.7599	6.36719			24.1623	20.2873
34.9127	178.145			45.0999	152.346
106.611	71.5327			86.8907	18.1534
37.2477	131.349			38.9811	144.719
77.1634				88.5701
66.6924				99.7301
73.2585				63.9303
88.4839				101.295
8.10181				16.7139
