# Supplementary material for: Preserving inhibition with a disinhibitory microcircuit in the retina
Source: eLife. 2020 Dec 3;9:e62618. doi: 10.7554/eLife.62618 (PMC7728437; doi:10.7554/eLife.62618)
Supplement: Figure 1—source data 1. [file elife-62618-fig1-data1.xlsx]

## Sheet: Figure 1e
Null Spike Count			Pref Spike Count			DSI
Control	Gabra2		Control	Gabra2		Control	Gabra2
2.33333	1.5		33.6667	13		0.87037	0.793103
11.3333	18.5		45	28.5		0.597633	0.212766
6.33333	14.6667		45	24.6667		0.753247	0.254237
23.3333	10.6667		53.6667	28.6667		0.393939	0.457627
5.33333	22.6667		23.6667	41.6667		0.632184	0.295337
12	10.3333		35	28.3333		0.489362	0.465517
5	12.3333		21.5	38.6667		0.622642	0.51634
4.66667	10.3333		15	24		0.525424	0.398058
5.33333	8.66667		39.6667	24.3333		0.762963	0.474747
8	14		16	25.5		0.333333	0.291139
9	4.33333		30	28.6667		0.538462	0.737374
7	0.666667		25.5	14.3333		0.569231	0.911111
4.5	9		19	16		0.617021	0.28
12.25	6		25	23.3333		0.342282	0.590909
2.66667	13		11.6667	38		0.627907	0.490196
5.5	13.6667		19	33.3333		0.55102	0.41844
4	18.3333		11.3333	32.6667		0.478261	0.281046
15.3333	5.33333		36	23.3333		0.402597	0.627907
6	6		14.6667	17.6667		0.419355	0.492958
5.5	11		17.5	29.3333		0.521739	0.454545
8			27			0.542857
4			17			0.619048
15.6667			23.6667			0.20339
0			11.3333			1
24.25			32.25			0.141593
18			30			0.25
11			57.3333			0.678049
21.5			50			0.398601

## Sheet: Figure 1f
Null Spike Count			Pref Spike Count			DSI
Control	Gabra2		Control	Gabra2		Control	Gabra2
2.33333	14		24	17.5		0.822785	0.111111
18.3333	1.5		42.6667	20.75		0.398907	0.865169
1.5	6.75		18	7.5		0.846154	0.0526316
0.5	17		9.5	28.5		0.9	0.252747
11.3333	20		29.6667	22		0.447154	0.047619
8	23.5		13	35.5		0.238095	0.20339
12.5	9.75		27.5	11.25		0.375	0.0714286
7.33333	17.25		25	31.25		0.546392	0.28866
9	9		24.25	29		0.458647	0.526316
11.75	14		23.75	27		0.338028	0.317073
5	5.33333		18	23.3333		0.565217	0.627907
13.6667	6.33333		32	16.6667		0.40146	0.449275
1	14.6667		15	16.3333		0.875	0.0537634
6.33333	5.33333		14	11		0.377049	0.346939
2.5	7.33333		26	31.6667		0.824561	0.623932
10.3333	4.66667		17.3333	28.6667		0.253012	0.72
8.33333	16.3333		17.6667	35.3333		0.358974	0.367742
2.66667	14		11.3333	36		0.619048	0.44
	9.33333			17.3333			0.3
	24.3333			30.3333			0.109756
	21.6667			30.6667			0.171975

## Sheet: Figure 1i
IPSC amplitude Pref			IPSC amplitudeNull
Control	Gabra2		Control	Gabra2
475.682	255.897		697.923	444.481
330.064	167.108		465.495	299.652
311.777	193.775		595.268	326.684
222.98	723.35		366.332	1232.97
284.317	463.417		543.564	689.935
323.205	204.752		497.877	375.823
307.558	301.912		448.969	480.002
467.929	231.035		1121.29	362.79
279.46	209.269		468.158	435.788
404.878	483.731		922.775	998.588
617.153	546.649		1142.97	712.905
255.202	1276.84		730.369	916.213
339.089	248.506		665.996	588.716
377.047	337.904		982.69	421.19
325.256	329.522		899.598	1059.27
307.84	495.817		864.298	1215.45
	267.754			515.98

## Sheet: Figure 1j
IPSC amplitude Pref			IPSC amplitudeNull
Control	Gabra2		Control	Gabra2
219.353	194.537		530.068	244.005
250.035	182.257		374.665	259.465
192.348	147.434		357.068	296.56
215.232	249.77		364.789	284.486
272.612	112.946		546.122	209.974
218.559	116.926		383.96	220.858
204.025	203.939		355.218	316.724
431.124	233.088		994.881	342.95
188.381	101.611		415.044	221.346
404.602	208.64		928.295	333.536
514.422	398.926		910.801	723.459
243.336	178.326		510.431	276.691
236.682	249.978		492.858	347.604
357.785	480.574		770.948	663.124
286.573	121.442		608.629	276.181
312.275	299.414		581.196	406.459
	180.149			328.537
