# Supplementary material for: Preserving inhibition with a disinhibitory microcircuit in the retina
Source: eLife. 2020 Dec 3;9:e62618. doi: 10.7554/eLife.62618 (PMC7728437; doi:10.7554/eLife.62618)
Supplement: Figure 2—figure supplement 1—source data 1. [file elife-62618-fig2-figsupp1-data1.xlsx]

## Sheet: Sup Figure 4b
control	Gabra2 cKO	Vgat cKO
-52.0803	-46.4174	-66.9171
-54.298	-53.4802	-56.2949
-59.7457	-60.827	-62.2995
-55.1361	-58.2042	-58.6367
-58.791	-60.3597	-53.1351
-61.8026	-48.0183	-58.0949
-42.9196	-62.5923	-62.6251
-56.6428	-54.7972	-58.9045
-45.9778	-47.9233	-50.8512
-51.9933	-58.644	-56.2949
-42.5348		-62.2995
		-58.6367
		-53.1351
		-58.0949
		-62.6251
	(all before correction for liquid junction potential of 14mv in current clamp)

## Sheet: Sup Figure 4c
control	Gabra2 cKO	Vgat cKO
16.3803	11.1224	17.7441
14.465	11.7772	11.3349
20.1687	11.281	17.6505
8.61707	15.6272	16.1087
12.823	10.7347	15.6341
11.3106	13.5523	17.1169
10.0756	16.1363	18.8511
8.64079	13.7892	17.4655
10.4918	15.7603	12.0742
17.0743	14.334	11.3349
12.7058		17.6505
		16.1087
		15.6341
		17.1169
		18.8511

## Sheet: Sup Figure 4d
control	Gabra2 cKO	Vgat cKO
-7.59569	-1.8706	-1.69295
-12.444	-0.069824	-1.68511
-2.75431	0.25002	-4.3265
-2.97893	-0.881836	-4.20727
-6.21698	-5.77329	-2.43085
-14.3114	-2.48473	-1.12814
-5.37944	-0.906666	-1.00389
-4.73321	-3.94079	-1.57152
-7.0092	-1.95975	-2.71682
-7.91366	-5.34501	-1.68511
-5.78023		-4.3265
		-4.20727
		-2.43085
		-1.12814
		-1.00389

## Sheet: Sup Figure 4e
control	Gabra2 cKO	Vgat cKO
397.3	70.4	239.3
513.8	0	48.6
256	0	249.7
477.6	0	267.4
420.2	446.9	208.9
601.5	58.9	36.8
671.1	0	0.2
526.2	206.1	45.4
472.3	33.5	414.7
452	326.2	48.6
555.8		249.7
		267.4
		208.9
		36.8
		0.2
