# Supplementary material for: Preserving inhibition with a disinhibitory microcircuit in the retina
Source: eLife. 2020 Dec 3;9:e62618. doi: 10.7554/eLife.62618 (PMC7728437; doi:10.7554/eLife.62618)
Supplement: Figure 2—source data 1. [file elife-62618-fig2-data1.xlsx]

## Sheet: Figure 2d
Control	Gabra2	Vgat
-49.3268	-49.8193	-64.5811
-49.7031	-58.477	-55.7284
-47.9985	-52.6988	-58.9073
-54.4833	-56.1473	-56.2569
-56.3212	-51.456	-53.4604
-62.7404	-68.6016	-55.1768
-64.4424	-46.9856	-60.665
-56.6281	-40.9617	-62.0479
-58.1046	-66.0428	-57.7288
-66.3714	-57.3679	-53.8758
-45.7477	-54.5552	-49.8955
-58.8278	-57.4461	-53.2069
-55.7197	-66.7392	-40.6569
-54.4891	-59.5633	-43.1719
-50.042	-49.8713	-46.7733
	( all before correction for liquid junciton potential of 14mv in current clamp)

## Sheet: Figure 2e
control	Gabra2	Vgat
-7.46756	0.173979	-0.995227
-4.94594	-1.1869	-2.39197
-10.5621	-1.02973	-2.70748
-6.55075	-2.93882	-2.53412
-10.1065	-2.8886	-4.02724
-11.4586	-3.3555	0.416994
-6.36746	-2.74111	-0.129746
-3.5878	-1.86523	-1.14722
-4.53456	-3.22869	-1.72693
-6.3113	-2.21684	-1.38309
-3.10219	-2.55406	-1.04854
-4.50023	-3.49387	-1.80815
-9.71129	-2.66453	-3.05784
-6.08085	-1.79983	-2.80608
-3.16029	-1.92178	-3.28058

## Sheet: Figure 2f
control	Gabra2	vgat
13.7682	11.2221	16.3786
12.5949	13.1794	11.7838
10.9915	13.4749	16.0763
14.0859	11.3312	12.2831
11.6119	11.2257	12.851
18.1067	16.4992	11.7747
16.0901	13.963	19.2723
13.6845	11.9285	21.0024
14.9351	18.8228	20.4872
17.2177	17.8476	17.8794
11.9166	20.2704	9.22232
13.672	15.5455	11.1734
17.6168	14.091	9.37468
18.1549	19.4232	12.3546
16.4245	12.136	14.5959

## Sheet: Figure 2g
control	Gabra2	vgat
0.812907	0.0116464	1.92561
-1.36557	1.87981	2.15402
-1.14167	2.63937	0.715887
-1.0666	3.42827	-0.582532
-0.0838613	-0.70656	2.25333
4.57144	4.08867	3.17441
4.1518	0.606663	6.78541
4.49114	2.91669	6.70194
3.00043	8.72475	5.76525
6.11915	3.97464	7.87403
4.09832	8.80233	1.52976
2.95722	1.68257	2.77936
4.21797	3.28268	0.401211
3.48048	11.8615	0.0463116
5.78287	1.89564	6.30886

## Sheet: Figure 2h
control	Gabra2	vgat
-5.80544	3.25695	3.71607
-5.21243	4.02128	2.97944
-2.77028	3.2494	0.541938
-4.80501	4.31313	1.361
-2.7377	2.88075	1.4784
-7.66042	4.25865	3.90046
-1.92738	2.01434	7.96357
-2.05218	2.59153	6.58293
0.117683	7.36664	5.2604
-4.54328	5.0282	7.98768
-0.249061	8.93438	1.65589
-0.437913	1.03902	2.18057
-0.283227	1.87746	0.233861
1.49391	0.244704	1.11509
1.35313	2.16345	5.45443

## Sheet: Figure 2i
control	Gabra2	vgat
14.0957	8.61231	11.6247
12.7827	10.8005	7.85915
12.1551	8.88515	13.9505
14.9773	9.58343	11.8931
12.6418	11.9268	12.5576
12.6469	9.13094	7.65353
9.31349	9.22208	9.83862
8.50025	8.03945	15.2059
10.1235	8.62906	13.6253
8.94541	9.52329	8.98561
9.47844	12.2785	7.79881
10.6012	12.5764	9.45397
13.73	15.5779	9.14878
14.441	9.11267	11.7813
14.2892	11.6828	7.72628
