# Supplementary material for: Preserving inhibition with a disinhibitory microcircuit in the retina
Source: eLife. 2020 Dec 3;9:e62618. doi: 10.7554/eLife.62618 (PMC7728437; doi:10.7554/eLife.62618)
Supplement: Figure 3—source data 1. [file elife-62618-fig3-data1.xlsx]

## Sheet: Figure 3c
Cell Pair ID	ISI (Inter-stimulus-interval)	Ratio
1	200	0.795805
	800	0.759184
	1600	0.86096
	50	0.836834
	100	0.824249
	400	0.729606
2	200	0.778249
	100	0.763482
	1600	0.82648
	50	0.717985
	400	0.858778
	800	0.97462
3	200	0.804888
	800	0.781172
	1600	1.22645
	100	0.866086
	400	0.761102
	50	0.77031
4	200	0.643414
	800	0.796872
	1600	0.990272
	100	0.695902
	50	0.967163
	400	0.841312
5	50	0.663487
	400	0.75191
	100	0.716508
	200	0.773998
	800	0.890847
	1600	0.98339
6	800	0.785064
	100	0.706325
	400	0.768659
	200	0.702102
	1600	1.06176
	50	0.602095
7	400	0.926844
	100	0.871335
	200	0.827668
	1600	1.01218
	800	0.890912
	50	0.936935
8	100	0.590004
	400	0.74529
	800	0.91729
	1600	0.930521
	50	0.831279
	200	0.820515
9	100	0.553952
	400	0.801838
	800	0.96403
	1600	1.04518
	50	0.68155
	200	0.870669
10	50	0.399047
	1600	0.946482
	400	0.950717
	100	0.801878
	800	0.918038
	200	1.04836
11	400	0.802494
	1600	0.934243
	100	0.739453
	800	0.87415
	200	0.806711
	50	0.685266
12	400	0.768377
	800	0.853176
	1600	1.03189
	50	0.896273
	200	0.903584
	100	0.809609
13	1600	0.988742
	50	0.595345
	800	0.958314
	400	0.913169
	200	0.7351
	100	0.74195
14	800	1.02341
	100	0.635617
	200	0.800322
	400	0.927181
	50	0.574715
	1600	1.04206
15	100	0.75982
	200	0.831624
	50	0.844557
	1600	1.15142
	800	0.904274
	400	0.835411
16	400	0.910172
	100	0.583933
	800	0.8009
	1600	1.0077
	200	0.742315
	50	0.451077
17	800	1.19667
	100	0.709097
	200	0.718155
	400	0.901559
	50	0.741148
	1600	1.13431
