# Supplementary material for: Preserving inhibition with a disinhibitory microcircuit in the retina
Source: eLife. 2020 Dec 3;9:e62618. doi: 10.7554/eLife.62618 (PMC7728437; doi:10.7554/eLife.62618)
Supplement: Figure 5—figure supplement 1—source data 1. [file elife-62618-fig5-figsupp1-data1.xlsx]

## Sheet: Sup Figure 5a
110 um/s			440 um/s			1320 um/s
control	gabra2 cKO		control	gabra2 cKO		control	gabra2 cKO
1.65354	0.911823		0.710695	2.18955		-0.48826	3.96769
2.34831	-0.00233586		1.84433	-0.958455		4.53652	1.65206
1.98252	2.18708		-0.339676	3.92917		-3.48053	1.90261
0.89005	3.37666		-0.287243	2.15788		-1.98886	1.24693
-0.0423384	2.91856		5.8744	11.8376		-1.24448	3.28601
1.25952	-0.0287721		5.81826	-2.52117		1.99798	-2.23769
-1.49323	0.205498		-2.90266	-0.807207		1.55359	4.04485
-1.80894	2.73109		-0.936103	-3.91722		3.26297	2.66982
-0.927675	2.69901		1.98252	3.81773		1.25859	2.74758
	1.38531		0.823686	1.97235		0.385168	3.68445
	1.32709		1.54096	1.32195		0.007109	1.69036
	0.593428		1.98686	0.820904		-0.47229	2.91409
			-0.594881	3.24843		-0.22119	0.913087
			-0.406421	1.79507		1.58637
			3.38648	4.93116		1.1329
						4.97359
						2.48356
						0.177623

## Sheet: Sup Figure 5b
110 um/s			440 um/s			1320 um/s
control	gabra2 cKO		control	gabra2 cKO		control	gabra2 cKO
-1.26771	-0.50771		-1.73185	0.0595143		-3.12548	-0.20969
-3.25198	-0.0326733		-2.31011	-1.46019		-1.96521	-0.952987
-1.72522	7.93581		-3.24134	0.878073		-1.77055	-1.35049
-1.56203	4.41334		-1.1055	0.588818		-1.26227	-0.360804
-1.93968	2.65565		-5.2388	1.78553		-5.53658	1.95218
-5.96733	-0.892986		-2.27266	-2.44784		-1.1224	-2.67376
-10.4752	-2.21993		-2.99321	-1.53709		-1.46364	0.32353
-2.72092	-2.74546		-3.95258	1.48914		-1.71766	-1.3499
-2.05298	-0.579465		-1.72522	-1.02311		-2.34399	2.73032
	-0.210819		-2.52171	1.60866		-1.54418	-1.34052
	0.0391634		-2.09719	1.19423		-1.81738	-0.655894
	-0.561355		-2.96056	0.200462		-2.39679	1.45426
			-14.0287	0.249955		-2.49625	-0.0498927
			-5.39874	-0.16983		-2.82497
			-2.34474	-0.235212		-1.34781
						-4.80338
						-5.8065
						-5.6494

## Sheet: Sup Figure 5c
110 um/s			440 um/s			1320 um/s
control	gabra2 cKO		control	gabra2 cKO		control	gabra2 cKO
11.9059	18.0596		10.1768	16.958		14.8953	13.4375
15.2056	17.7658		11.2458	16.5254		12.3435	16.9383
12.4317	10.4995		12.0793	18.1372		8.98258	15.7191
7.0606	16.2555		11.4188	15.9569		9.67542	15.0883
8.86223	15.6506		18.9953	12.7624		20.7732	10.8131
18.7219	8.15909		9.29446	13.3876		6.88198	21.0289
20.4471	10.2675		18.2791	11.4827		6.63337	6.12816
19.1845	9.48181		15.3747	15.1992		15.1513	9.16618
18.9778	10.1539		12.4317	6.47699		9.80085	7.72034
	12.4064		12.832	8.97903		14.7726	6.87255
	8.82021		10.3004	8.45085		8.02866	9.84644
	9.19442		7.32337	6.75292		9.57078	6.79652
			18.5317	8.71876		11.3202	7.15302
			18.2031	6.27319		11.9509
			15.7872	6.61924		9.27375
						23.8884
						15.8096
						18.1339
