# Supplementary material for: Preserving inhibition with a disinhibitory microcircuit in the retina
Source: eLife. 2020 Dec 3;9:e62618. doi: 10.7554/eLife.62618 (PMC7728437; doi:10.7554/eLife.62618)
Supplement: Figure 5—source data 1. [file elife-62618-fig5-data1.xlsx]

## Sheet: Figure 5b
Window 1 cKO		Window 3 cKO
1.11372		1.28822
1.00172		0.770859
0.993461		0.620417
0.917663		0.967096
0.831428		0.669701
0.995608		0.558792
1.10721		0.55962
0.966102		0.679902
1.00302		0.703498
0.901608		0.739946
1.07362		0.550795
0.980914		0.654001
0.873036		0.850604
0.876336		0.300853
1.00581		0.445384
0.784788		0.899346
0.975965		0.618415
1.16709		0.570294
1.40705		0.84995
0.88495		0.589077
0.993412		0.606574
0.939426		1.00644

## Sheet: Figure 5d
4x			3x			5x
control	cKO		control	cKO		control	cKO
1.04991	0.768873		0.87455	0.750496		0.786448	0.791893
1.08288	0.823287		0.699662	0.574521		1.03234	1.05308
0.986678	0.883935		1.01313	0.938745		0.799829	0.731554
1.10919	0.704412		1.0119	0.660249		0.957647	0.810042
1.57582	0.72632		1.29451	1.09295		0.881317	0.843804
1.16434	0.522748		1.14718	0.70691		1.03386	0.964558
1.05945	0.99584		1.11098	0.903921		0.93089	0.854874
0.726821	0.71086		1.09213	1.10413		0.914211	0.68456
1.02826	0.945531
1.06196	0.770783
1.07331	0.903387
0.542855	0.940801
1.28967	0.871795
0.628651	0.766714
1.20996	0.770316
0.93821	0.815744
0.851181	0.607162

## Sheet: Figure 5f
110 um/s	440 um/s	1320 um/s
1387.5	146.1	126.1
213.8	26.5	24.7
640.1	378.9	212.2
302.2	272.6	112.2
904	499.6	47.3
1410	301.9	87.5
1360	85.1	56.1
310	505.9	217.4
235	142.4	144.8
1353.5	120.4	84.5
1012.4	172.1	68.4
	274.6	123.3
	305.4	172.5
	213.5	142.4
	436	144.4
	388.7	207.9
	300.5	154.4
	453	141.9
	310.7	114.9
	466.4	235.5
	289.2	144.7

## Sheet: Figure 5h
110 um/s	440 um/s	1320 um/s
-0.188227	0.231127	0.065596
0.0274827	0.176713	0.0948958
-0.0304839	0.116065	-0.0509967
0.00370672	0.295588	-0.0259306
-0.0218107	0.27368	0.0127273
-0.0820529	0.477252	-0.367631
-0.280043	0.00416041	-0.255511
-0.0437134	0.28914	-0.0505079
-0.166334	0.0544691	-0.213265
-0.0299815	0.229217	-0.27303
-0.130166	0.096613	-0.144445
	0.0591989
	0.128205
	0.233286
	0.229684
	0.184256
	0.392838
x100%	x100%	x100%
