# Supplementary material for: Preserving inhibition with a disinhibitory microcircuit in the retina
Source: eLife journal article supplement (doi:10.7554/elife.62618), 2020-12-03
Supplement: supp [file elife_poa_e62618_Figure_2_figure_supplement_1.pdf › elife_poa_e62618_Figure_2_figure_supplement_1.pdf]

Figure 2-figure supplement 1

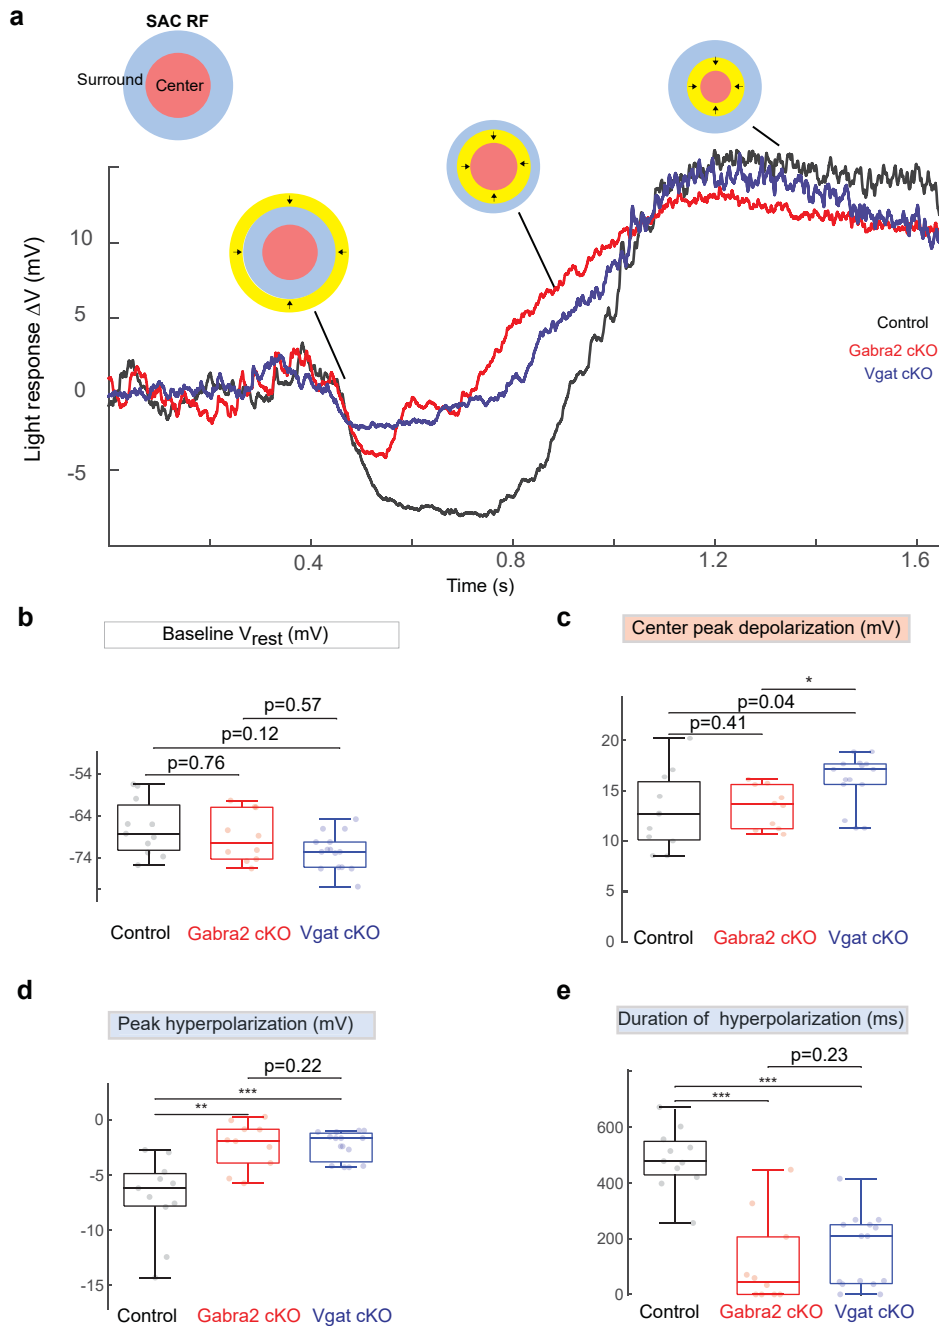

Figure 2-figure supplement 1. Weakened motion-evoked surround suppression of SACs in Gabra2 cKO and Vgat cKO mice during contracting ring stimulus.

a. Example Vm traces (baseline adjusted) from three SACs (Control, black; Gabra2 cKO, red; Vgat cKO, blue) during contracting ring stimuli. The ring was centered on the soma and moved inward at a speed of 265  $\mu\text{m/s}$ . Resting membrane potential  $V_{\text{rest}}$  calculated as the mean baseline Vm of a 500 ms time window before visual stimuli was presented to the retina. Insets: Upper left: schematic of the center-surround RF structure of a SAC.

b. Mean Vm during the Baseline time window. Box plots represent minimum / first quartile / median / third quartile / maximum values for this and subsequent figures, grey dots represent individual cells.

c. Peak depolarization calculated as the peak Vm relative to  $V_{\text{rest}}$ .

d. Peak hyperpolarization calculated as the valley of Vm during relative to  $V_{\text{rest}}$  when contracting rings stimulates the surround of the SAC.

e. Duration of hyperpolarization phase when contracting ring activates the surround of SAC. The duration of hyperpolarization is defined as the total period of Vm hyperpolarized by more than 1 mV when contracting ring moves in the surround of the SAC. Control, n = 11 cells from 5 mice. Gabra2 cKO, n = 10 cells from 4 mice. Vgat cKO, n = 15 cells from 3 mice.
